# Supplementary material for: Utility of Childhood Glucose Homeostasis Variables in Predicting Adult Diabetes and Related Cardiometabolic Risk Factors: The Bogalusa Heart Study
Source: PubMed Central journal article supplement — Diabetes Care. 2009 Dec 15;33(3):670–5. doi: 10.2337/dc09-1635 (PMC2827529; doi:10.2337/dc09-1635), 2009-12-15
Supplement: supp_dc09-1635_dc09-1635_Online_appendix.pdf [file supp_dc09-1635_dc09-1635_Online_appendix.pdf]

**Supplementary Table 1. Prevalence (%) of cardiometabolic risk factors at the last survey in adulthood by childhood glucose, insulin, and HOMA-IR status.**

| Adulthood risk factors                                    | Childhood glucose level |      |                      | Childhood insulin level |      |          | Childhood HOMA-IR level |      |          |
|-----------------------------------------------------------|-------------------------|------|----------------------|-------------------------|------|----------|-------------------------|------|----------|
|                                                           | Low                     | High | P-value <sup>a</sup> | Low                     | High | P-value  | Low                     | High | P-value  |
| Obesity                                                   |                         |      |                      |                         |      |          |                         |      |          |
| Waist > 102 cm for male; > 88 cm for female               | 34.8                    | 38.9 | 0.262                | 30.1                    | 58.6 | < 0.0001 | 29.4                    | 60.3 | < 0.0001 |
| Hypertension                                              |                         |      |                      |                         |      |          |                         |      |          |
| ≥ 130/85 mmHg or Rx                                       | 14.9                    | 19.9 | 0.071                | 13.8                    | 24.7 | < 0.0001 | 14.1                    | 22.8 | < 0.01   |
| Dyslipidemia                                              |                         |      |                      |                         |      |          |                         |      |          |
| HDL-C < 40 mg/dL for males, < 50 mg/dL for females, or Rx | 49.7                    | 47.9 | 0.637                | 47.1                    | 58.6 | < 0.01   | 47.1                    | 58.0 | < 0.01   |
| LDL-C ≥ 160 mg/dL or Rx                                   | 10.0                    | 19.4 | 0.0001               | 11.2                    | 14.5 | 0.182    | 11.1                    | 14.8 | 0.126    |
| Triglycerides ≥ 150 mg/dL or Rx                           | 17.5                    | 28.0 | < 0.001              | 18.4                    | 24.2 | 0.054    | 17.6                    | 27.3 | < 0.01   |
| Hyperglycemia                                             |                         |      |                      |                         |      |          |                         |      |          |
| Glucose ≥ 100 mg/dL or Rx                                 | 4.6                     | 9.6  | < 0.01               | 4.2                     | 11.3 | < 0.0001 | 4.0                     | 11.7 | < 0.0001 |
| Metabolic syndrome <sup>b</sup>                           | 14.4                    | 21.0 | < 0.05               | 12.1                    | 30.7 | < 0.0001 | 11.8                    | 31.3 | < 0.0001 |

Abbreviations as in Table 1. To convert the values for glucose to millimoles per liter, divide by 18; cholesterol to millimoles per liter, multiply by 0.02586; triglycerides to millimoles per liter, multiply by 0.01129.

<sup>a</sup>Different from high (top quintile) vs low (the rest).

<sup>b</sup>Defined by the National Cholesterol Education Program Adult Treatment Panel III.
